# Supplementary material
Source: PubMed Central journal article supplement (PMC1562544)

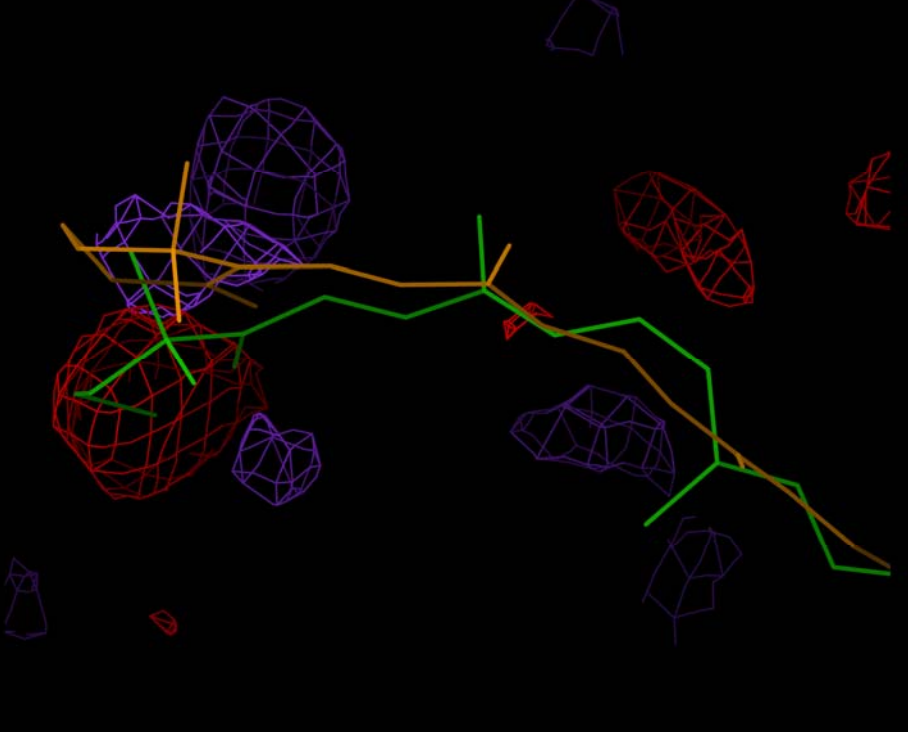

Supplement: pnas_0601765103_2.pdf [file pnas_0601765103_2.pdf]
